# Supplementary material for: Predicting the Temperature Evolution during Nanomilling of Drug Suspensions via a Semi-Theoretical Lumped-Parameter Model
Source: MDPI journal article supplement (doi:10.3390/pharmaceutics14122840), 2022-12-18
Supplement: s1 [file s1]

# **Supplementary Material**

## **Predicting the Temperature Evolution during Nanomilling of Drug Suspensions via a Semi-Theoretical Lumped-Parameter Model**

**Gulenay Guner <sup>1</sup>, Dogacan Yilmaz <sup>2</sup>, Helen F. Yao <sup>3</sup>, Donald J. Clancy <sup>3</sup> and Ecevit Bilgili <sup>1,\*</sup>**

<sup>1</sup> Otto H. York Department of Chemical and Materials Engineering New Jersey Institute of Technology, Newark, NJ 07102, USA

<sup>2</sup> Department of Mechanical and Industrial Engineering, New Jersey Institute of Technology, Newark, NJ 07114, USA

<sup>3</sup> GlaxoSmithKline, Drug Product Development, Collegeville, PA 19426, USA

\* Correspondence: bilgece@njit.edu

**Table S1.** Mean squared error (MSE) and mean absolute error (MAE) of the model predictions for  $Q_{\text{gen}}$  and  $UA$  in the training and test tests.

| Model name               | $Q_{\text{gen}}$ (J/min) |                    |                    |                    | $UA$ (J/min°C)     |      |                    |      |
|--------------------------|--------------------------|--------------------|--------------------|--------------------|--------------------|------|--------------------|------|
|                          | Train                    |                    | Test               |                    | Train              |      | Test               |      |
|                          | MSE                      | MAE                | MSE                | MAE                | MSE                | MAE  | MSE                | MAE  |
| Power law                | $3.28 \times 10^5$       | $4.64 \times 10^2$ | $2.86 \times 10^5$ | $4.50 \times 10^2$ | $8.28 \times 10^2$ | 22.0 | $5.48 \times 10^2$ | 19.4 |
| Linear regression        | $1.27 \times 10^6$       | $9.23 \times 10^2$ | $1.55 \times 10^6$ | $9.27 \times 10^2$ | $9.53 \times 10^2$ | 24.0 | $1.00 \times 10^3$ | 22.2 |
| Lasso regression         | $1.27 \times 10^6$       | $9.22 \times 10^2$ | $1.56 \times 10^6$ | $9.28 \times 10^2$ | $9.70 \times 10^2$ | 24.0 | $1.13 \times 10^3$ | 23.3 |
| Ridge regression         | $1.55 \times 10^6$       | $9.98 \times 10^2$ | $1.27 \times 10^6$ | $8.86 \times 10^2$ | $1.05 \times 10^3$ | 25.0 | $8.52 \times 10^2$ | 19.9 |
| Elastic net regression   | $6.00 \times 10^6$       | $2.03 \times 10^3$ | $1.66 \times 10^6$ | $1.15 \times 10^3$ | $2.57 \times 10^3$ | 40.1 | $8.44 \times 10^2$ | 24.8 |
| Decision tree            | 0.00                     | 0.00               | $2.69 \times 10^6$ | $1.45 \times 10^3$ | 0.00               | 0.00 | $1.84 \times 10^3$ | 39.4 |
| Gradient boost           | $8.66 \times 10^3$       | $7.40 \times 10^1$ | $2.51 \times 10^6$ | $1.38 \times 10^3$ | $4.64 \times 10^1$ | 5.21 | $1.34 \times 10^3$ | 33.7 |
| Random forest            | $1.18 \times 10^5$       | $2.72 \times 10^2$ | $3.01 \times 10^6$ | $1.50 \times 10^3$ | $1.60 \times 10^2$ | 10.0 | $1.63 \times 10^3$ | 36.3 |
| K nearest neighborhood   | $1.58 \times 10^6$       | $9.30 \times 10^2$ | $3.63 \times 10^5$ | $4.62 \times 10^2$ | $8.88 \times 10^2$ | 22.4 | $4.32 \times 10^2$ | 16.9 |
| Support vector regressor | $1.09 \times 10^7$       | $2.48 \times 10^3$ | $2.11 \times 10^6$ | $1.18 \times 10^3$ | $3.66 \times 10^3$ | 46.3 | $6.83 \times 10^2$ | 22.4 |
| Multilayer perceptron    | $2.37 \times 10^7$       | $3.79 \times 10^3$ | $1.01 \times 10^7$ | $3.11 \times 10^3$ | $2.07 \times 10^3$ | 39.5 | $1.06 \times 10^3$ | 29.4 |

**Table S2.** Particle size statistics for the milled suspensions.

| Run no. | $d_{10}$ ( $\mu\text{m}$ ) | $d_{50}$ ( $\mu\text{m}$ ) | $d_{90}$ ( $\mu\text{m}$ ) |
|---------|----------------------------|----------------------------|----------------------------|
| 1       | $0.178 \pm 0.003$          | $0.314 \pm 0.004$          | $0.566 \pm 0.014$          |
| 2       | $0.190 \pm 0.012$          | $0.326 \pm 0.011$          | $0.592 \pm 0.025$          |
| 3       | $0.212 \pm 0.008$          | $0.400 \pm 0.015$          | $1.63 \pm 0.016$           |
| 4       | $0.158 \pm 0.049$          | $0.263 \pm 0.009$          | $0.454 \pm 0.015$          |
| 5       | $0.140 \pm 0.006$          | $0.296 \pm 0.053$          | $0.490 \pm 0.015$          |
| 6       | $0.185 \pm 0.002$          | $0.335 \pm 0.007$          | $0.661 \pm 0.016$          |
| 7       | $0.120 \pm 0.001$          | $0.204 \pm 0.001$          | $0.344 \pm 0.002$          |
| 8       | $0.123 \pm 0.001$          | $0.238 \pm 0.002$          | $0.382 \pm 0.001$          |
| 9       | $0.100 \pm 0.011$          | $0.241 \pm 0.003$          | $0.468 \pm 0.011$          |
| 10      | $0.122 \pm 0.001$          | $0.199 \pm 0.006$          | $0.325 \pm 0.025$          |
| 11      | $0.113 \pm 0.002$          | $0.221 \pm 0.023$          | $0.421 \pm 0.016$          |
| 12      | $0.167 \pm 0.014$          | $0.317 \pm 0.019$          | $0.642 \pm 0.041$          |
| 13      | $0.120 \pm 0.005$          | $0.174 \pm 0.001$          | $0.249 \pm 0.001$          |
| 14      | $0.121 \pm 0.001$          | $0.175 \pm 0.001$          | $0.246 \pm 0.000$          |
| 15      | $0.071 \pm 0.002$          | $0.223 \pm 0.006$          | $0.446 \pm 0.015$          |
| 16      | $0.111 \pm 0.001$          | $0.162 \pm 0.001$          | $0.235 \pm 0.000$          |
| 17      | $0.112 \pm 0.001$          | $0.162 \pm 0.000$          | $0.234 \pm 0.001$          |
| 18      | $0.102 \pm 0.008$          | $0.165 \pm 0.005$          | $0.258 \pm 0.001$          |
| 19      | $0.116 \pm 0.004$          | $0.172 \pm 0.002$          | $0.250 \pm 0.001$          |
| 20      | $0.111 \pm 0.003$          | $0.173 \pm 0.002$          | $0.256 \pm 0.000$          |
| 21      | $0.088 \pm 0.005$          | $0.244 \pm 0.002$          | $0.490 \pm 0.003$          |
| 22      | $0.109 \pm 0.001$          | $0.159 \pm 0.001$          | $0.232 \pm 0.001$          |
| 23      | $0.111 \pm 0.001$          | $0.162 \pm 0.000$          | $0.235 \pm 0.000$          |
| 24      | $0.105 \pm 0.001$          | $0.196 \pm 0.001$          | $0.384 \pm 0.007$          |
| 25      | $0.103 \pm 0.002$          | $0.149 \pm 0.001$          | $0.223 \pm 0.001$          |
| 26      | $0.106 \pm 0.004$          | $0.154 \pm 0.003$          | $0.229 \pm 0.001$          |
| 27      | $0.106 \pm 0.007$          | $0.179 \pm 0.008$          | $0.329 \pm 0.054$          |

<sup>a</sup>The standard deviation refers to multiple measurements by laser diffraction ( $n = 4$ ). It is not a descriptor of a Gaussian particle size distribution. Adapted From Guner et al. (2022) [34].
